# Supplementary material for: Enzyme-Linked Phage Receptor Binding Protein Assays (ELPRA) Enable Identification of Bacillus anthracis Colonies
Source: MDPI journal article supplement (doi:10.3390/v13081462), 2021-07-27
Supplement: s1 [file s1]

# Supplementary material for: Enzyme-linked phage receptor binding protein assay (ELPRA) enables identification of *Bacillus anthracis* colonies

Peter Braun ‡, Nadja Rupprich ‡, Diana Neif and Gregor Grass \*

Bundeswehr Institute of Microbiology (IMB), Dept. of Bacteriology and Toxinology, 80937 Munich, Germany;  
peter3braun@bundeswehr.org (P.B.); nadjarupprich@googlemail.com (N.R.); diananeif@bundeswehr.org (D.N.);  
gregorgrass@bundeswehr.org (G.G.)

\* Correspondence: gregorgrass@bundeswehr.org; Tel.: +49-99-2692-3981

‡ Both authors contributed equally to this work.

**Supplementary Table S1: Strains, used in this work.**

| Species               | Strain             | Characteristics                                                          | Reference                                                                |
|-----------------------|--------------------|--------------------------------------------------------------------------|--------------------------------------------------------------------------|
| <i>B. anthracis</i>   | Sterne             | pXO1 <sup>+</sup> , pXO2 <sup>-</sup> ; host of Gamma phage <sup>-</sup> | [16]                                                                     |
| <i>B. anthracis</i>   | ATCC4229 (Pasteur) | pXO1 <sup>-</sup> , pXO2 <sup>+</sup> ; host of Gamma phage              | American Type Culture Collection                                         |
| <i>B. cereus</i>      | ATCC10987          | Not a host of Gamma phage                                                | American Type Culture Collection                                         |
| <i>B. cereus</i>      | ATCC4342           | Host of Gamma phage                                                      | American Type Culture Collection                                         |
| <i>B. cereus</i>      | CDC2000032805      | Host of Gamma phage                                                      | Centers of Disease Control and Prevention                                |
| <i>B. cereus</i>      | IMB-4-0-Rott       | Not a host of Gamma phage; weak $\beta$ -hemolysis on blood agar         | This work; strain collection of the Bundeswehr Institute of Microbiology |
| <i>B. cereus</i> s.l. | IMB-2021-1         | Host of Gamma phage, no $\beta$ -hemolysis on blood agar                 | This work; strain collection of the Bundeswehr Institute of Microbiology |

**Supplementary Table S2: Oligonucleotide primers used for DNA sequencing and cloning in this work.**

| Oligonucleotide | Sequence (5'-3')                           | Reference  |
|-----------------|--------------------------------------------|------------|
| 27f             | AGAGTTTGATCMTGGCTCAG                       | [21]       |
| 341f            | CCTACGGGAGGCAGCAG                          | [22]       |
| 534r            | ATTACCGCGGCTGCTGG                          | [22]       |
| 1492r           | TACGGYTACCTTGTTACGACTT                     | [21]       |
| NanoLuc forward | AAAT <u>GTACAGTCTT</u> CACACTCGAAGATTTCGTT | This study |
| NanoLuc reverse | AAACTCGAGCGCCAGAATGCGTTCGCA                | This study |

M = A or C; Y = C or T. Restriction endonuclease recognition sites are underscored.

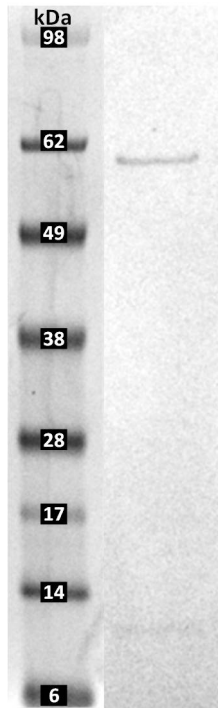

**Supplementary Figure S1:** SDS-PAGE of heterologously produced NanoLuc-RBP $\Delta 03\Delta 1-120$ -reporter protein. Affinity purified fusion protein was subjected to SDS-PAGE and NanoLuc-RBP $\Delta 03\Delta 1-120$  protein detected using Imperial<sup>TM</sup> protein stain (ThermoScientific, Dreieich, Germany). The expected size of the NanoLuc-RBP $\Delta 03\Delta 1-120$  protein was calculated as 66 kDa. Numbers indicate size-positions of the protein size marker (SeeBlue Plus2 prestained, ThermoFisher Scientific, Darmstadt, Germany).

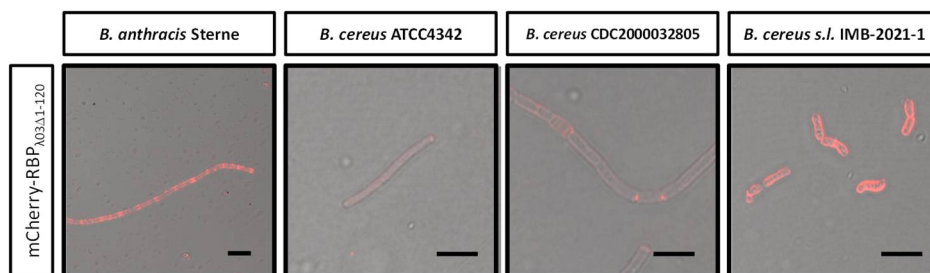

**Supplementary Figure S2:** Binding of mCherry-RBP $\Delta 03\Delta 1-120$ -reporter to cells of cultures of *B. anthracis* and cross-reacting *B. cereus* cells, respectively. Cultures were grown overnight (16 h) at 37°C with shaking. Cells were labeled (red signals) by adding mCherry-RBP $\Delta 03\Delta 1-120$  protein, washed to remove unbound RBP and subjected to microscopy. Representative micrographs for labeling of the indicated, *B. cereus* cells are depicted as merged images from light- and fluorescence (excitation: 587 nm, emission: 610 nm) microscopy. Scale bar: 5  $\mu$ m.

## References

16. Sterne M, Proom H Induction of motility and capsulation in *Bacillus anthracis*. J Bacteriol 1957, 74: 541-542.
21. Lane DJ, Pace B, Olsen GJ, Stahl DA, Sogin ML, Pace NR Rapid determination of 16S ribosomal RNA sequences for phylogenetic analyses. Proc Natl Acad Sci U S A 1985, 82: 6955-6959.
22. Watanabe K, Kodama Y, Harayama S Design and evaluation of PCR primers to amplify bacterial 16S ribosomal DNA fragments used for community fingerprinting. Journal of Microbiological Methods 2001, 44: 253-262.
